# Supplementary material for: Evaluation of Hemp Seed Oils Stability under Accelerated Storage Test
Source: MDPI journal article supplement (doi:10.3390/antiox11030490), 2022-02-28
Supplement: s1 [file s1]

# Supplementary materials

1

**Table S1.** Results of the determination of fatty acids expressed as g/100 g of oil. Data are reported as mean±standard deviation of 4 injections of 2 independent replicates. Different letter in row indicates statistically significant differences between time 0 and time 18 (one-way ANOVA, p<0.05, Tukey’s HSD).

2

3

| Fatty acid                     | Sample 1           |                    | Sample 2           |                    | Sample 3           |                    | Sample 4           |                    | Sample 5           |                    | Sample 6           |                    | Sample 7           |                    | Sample 8           |                    | Sample 9           |                    |
|--------------------------------|--------------------|--------------------|--------------------|--------------------|--------------------|--------------------|--------------------|--------------------|--------------------|--------------------|--------------------|--------------------|--------------------|--------------------|--------------------|--------------------|--------------------|--------------------|
|                                | T0                 | T18                |
| g/100 g of oil                 |                    |                    |                    |                    |                    |                    |                    |                    |                    |                    |                    |                    |                    |                    |                    |                    |                    |                    |
| Myristic acid                  | 0.03               | 0.03               | 0.03               | 0.03               | 0.03               | 0.02               | 0.03               | 0.03               | 0.04               | 0.04               | 0.03               | 0.03               | 0.03               | 0.03               | 0.03               | 0.03               | 0.03               | 0.03               |
|                                | ±0.00              | ±0.01              | ±0.00              | ±0.00              | ±0.00              | ±0.00              | ±0.00              | ±0.01              | ±0.00              | ±0.00              | ±0.00              | ±0.00              | ±0.00              | ±0.00              | ±0.00              | ±0.00              | ±0.00              | ±0.00              |
| Palmitic acid                  | 5.78 <sup>b</sup>  | 6.62 <sup>a</sup>  | 6.16               | 6.45               | 5.89               | 6.24               | 6.24               | 5.96               | 6.30               | 6.42               | 5.43 <sup>b</sup>  | 6.21 <sup>a</sup>  | 6.46 <sup>b</sup>  | 7.05 <sup>a</sup>  | 5.45 <sup>b</sup>  | 6.17 <sup>a</sup>  | 5.47 <sup>b</sup>  | 6.40 <sup>a</sup>  |
|                                | ±0.34              | ±0.08              | ±0.13              | ±0.07              | ±0.07              | ±0.24              | ±0.04              | ±0.27              | ±0.08              | ±0.02              | ±0.12              | ±0.07              | ±0.18              | ±0.14              | ±0.11              | ±0.17              | ±0.03              | ±0.08              |
| <i>trans</i> -palmitoleic acid | 0.03               | 0.03               | 0.03               | 0.04               | 0.03               | 0.03               | 0.03               | 0.03               | 0.03               | 0.03               | 0.03               | 0.03               | 0.03               | 0.03               | 0.03               | 0.03               | 0.03               | 0.03               |
|                                | ±0.00              | ±0.00              | ±0.00              | ±0.00              | ±0.00              | ±0.00              | ±0.00              | ±0.00              | ±0.00              | ±0.00              | ±0.00              | ±0.00              | ±0.00              | ±0.00              | ±0.00              | ±0.00              | ±0.00              | ±0.00              |
| Palmitoleic acid               | 0.10               | 0.11               | 0.11               | 0.11               | 0.11               | 0.11               | 0.11               | 0.10               | 0.11               | 0.11               | 0.10               | 0.11               | 0.10               | 0.11               | 0.11               | 0.11               | 0.11               | 0.12               |
|                                | ±0.01              | ±0.00              | ±0.00              | ±0.00              | ±0.00              | ±0.01              | ±0.00              | ±0.00              | ±0.00              | ±0.00              | ±0.00              | ±0.00              | ±0.00              | ±0.00              | ±0.00              | ±0.00              | ±0.00              | ±0.01              |
| Stearic acid                   | 2.25               | 2.61               | 2.50               | 2.65               | 2.56               | 2.76               | 2.58               | 2.45               | 2.54               | 2.62               | 1.92               | 2.22               | 2.55               | 2.81               | 1.99               | 2.29               | 1.98               | 2.33               |
|                                | ±0.14              | ±0.00              | ±0.06              | ±0.04              | ±0.03              | ±0.10              | ±0.02              | ±0.14              | ±0.03              | ±0.01              | ±0.04              | ±0.03              | ±0.07              | ±0.06              | ±0.04              | ±0.08              | ±0.02              | ±0.02              |
| Oleic acid                     | 11.46 <sup>b</sup> | 12.32 <sup>a</sup> | 10.97 <sup>b</sup> | 11.54 <sup>a</sup> | 10.84 <sup>b</sup> | 11.50 <sup>a</sup> | 13.10 <sup>a</sup> | 12.29 <sup>b</sup> | 12.88              | 13.07              | 7.05 <sup>b</sup>  | 8.09 <sup>a</sup>  | 11.13 <sup>b</sup> | 12.07 <sup>a</sup> | 7.67 <sup>b</sup>  | 8.57 <sup>a</sup>  | 8.44 <sup>b</sup>  | 9.80 <sup>a</sup>  |
|                                | ±0.67              | ±0.10              | ±0.25              | ±0.07              | ±0.14              | ±0.53              | ±0.03              | ±0.57              | ±0.15              | ±0.12              | ±0.24              | ±0.05              | ±0.25              | ±0.20              | ±0.17              | ±0.15              | ±0.03              | ±0.07              |
| Vaccenic acid                  | 0.77               | 0.88               | 0.70               | 0.73               | 0.67               | 0.71               | 0.82               | 0.78               | 0.84               | 0.86               | 0.75               | 0.85               | 0.65               | 0.69               | 0.75               | 0.83               | 0.77               | 0.88               |
|                                | ±0.05              | ±0.01              | ±0.02              | ±0.01              | ±0.01              | ±0.03              | ±0.00              | ±0.04              | ±0.01              | ±0.01              | ±0.02              | ±0.01              | ±0.01              | ±0.01              | ±0.02              | ±0.01              | ±0.00              | ±0.01              |
| <i>trans</i> -linoleic acid    | 0.06 <sup>a</sup>  | 0.01 <sup>b</sup>  | 0.09 <sup>a</sup>  | 0.05 <sup>b</sup>  | 0.07               | 0.07               | 0.03 <sup>a</sup>  | 0.01 <sup>b</sup>  | 0.04               | 0.04               | 0.06 <sup>a</sup>  | 0.02 <sup>b</sup>  | 0.05 <sup>a</sup>  | 0.02 <sup>b</sup>  | 0.04 <sup>a</sup>  | 0.02 <sup>b</sup>  | 0.03               | n.d.               |
|                                | ±0.00              | ±0.00              | ±0.00              | ±0.00              | ±0.00              | ±0.00              | ±0.00              | ±0.00              | ±0.00              | ±0.01              | ±0.01              | ±0.00              | ±0.00              | ±0.00              | ±0.00              | ±0.00              | ±0.00              |                    |
| <i>cis-trans</i> linoleic acid | 0.31               | 0.32               | 0.24               | 0.25               | 0.24               | 0.24               | 0.29               | 0.27               | 0.30               | 0.28               | 0.29               | 0.30               | 0.23               | 0.24               | 0.28               | 0.30               | 0.29               | 0.30               |
|                                | ±0.01              | ±0.00              | ±0.00              | ±0.00              | ±0.00              | ±0.00              | ±0.01              | ±0.00              | ±0.01              | ±0.01              | ±0.00              | ±0.00              | ±0.00              | ±0.00              | ±0.00              | ±0.01              | ±0.01              | ±0.00              |
| <i>trans-cis</i> linoleic acid | n.d.               | n.d.               | 0.05               | 0.05               | 0.04               | 0.05               | 0.05               | 0.04               | 0.06               | 0.04               | n.d.               | n.d.               | 0.04               | 0.04               | 0.04               | 0.05               | 0.04               | 0.04               |
|                                |                    |                    | ±0.00              | ±0.00              | ±0.00              | ±0.00              | ±0.00              | ±0.00              | ±0.01              | ±0.00              |                    |                    | ±0.00              | ±0.00              | ±0.00              | ±0.00              | ±0.00              | ±0.00              |
| Linoleic acid                  | 48.63 <sup>b</sup> | 50.95 <sup>a</sup> | 50.67 <sup>b</sup> | 52.05 <sup>a</sup> | 50.67 <sup>b</sup> | 52.01 <sup>a</sup> | 48.10 <sup>a</sup> | 46.25 <sup>b</sup> | 49.87 <sup>a</sup> | 47.57 <sup>b</sup> | 49.95 <sup>b</sup> | 52.32 <sup>a</sup> | 51.25 <sup>b</sup> | 53.13 <sup>a</sup> | 49.40 <sup>b</sup> | 52.32 <sup>a</sup> | 46.24 <sup>b</sup> | 51.47 <sup>a</sup> |
|                                | ±3.27              | ±0.85              | ±1.06              | ±1.64              | ±0.34              | ±2.54              | ±0.42              | ±0.32              | ±0.59              | ±1.87              | ±2.37              | ±0.07              | ±1.04              | ±0.64              | ±1.20              | ±0.69              | ±0.39              | ±0.04              |

|                          |                            |                            |                            |                            |                            |                            |                            |                            |                            |                            |                            |                            |                            |                            |                            |                            |                             |                             |
|--------------------------|----------------------------|----------------------------|----------------------------|----------------------------|----------------------------|----------------------------|----------------------------|----------------------------|----------------------------|----------------------------|----------------------------|----------------------------|----------------------------|----------------------------|----------------------------|----------------------------|-----------------------------|-----------------------------|
| Arachidonic acid         | 0.72<br>±0.05              | 0.84<br>±0.01              | 0.57<br>±0.01              | 0.61<br>±0.01              | 0.58<br>±0.01              | 0.62<br>±0.03              | 0.72<br>±0.01              | 0.69<br>±0.04              | 0.71<br>±0.01              | 0.74<br>±0.01              | 0.75<br>±0.02              | 0.87<br>±0.01              | 0.59<br>±0.02              | 0.64<br>±0.02              | 0.76<br>±0.02              | 0.87<br>±0.03              | 0.74<br>±0.01               | 0.86<br>±0.01               |
| γ-linolenic acid         | 2.38<br>±0.21              | 2.60<br>±0.14              | 0.39<br>±0.01              | 0.37<br>±0.01              | 0.37<br>±0.02              | 0.38<br>±0.03              | 1.59<br>±0.06              | 1.37<br>±0.04              | 1.58<br>±0.02              | 1.35<br>±0.16              | 3.39<br>±0.34              | 3.83<br>±0.03              | 0.37<br>±0.01              | 0.37<br>±0.00              | 3.68<br>±0.12              | 3.53<br>±0.03              | 3.59<br>±0.02               | 3.85<br>±0.08               |
| Eicosenoic acid (n-9)    | 0.24<br>±0.02              | 0.29<br>±0.00              | 0.22<br>±0.01              | 0.24<br>±0.00              | 0.25<br>±0.00              | 0.27<br>±0.02              | 0.27<br>±0.00              | 0.26<br>±0.02              | 0.28<br>±0.00              | 0.28<br>±0.00              | 0.28<br>±0.01              | 0.33<br>±0.00              | 0.25<br>±0.01              | 0.27<br>±0.01              | 0.28<br>±0.01              | 0.32<br>±0.01              | 0.27<br>±0.01               | 0.32<br>±0.00               |
| α-linolenic acid         | 11.38<br>±0.89             | 11.51<br>±0.27             | 14.96<br>±0.25             | 14.47<br>±0.12             | 15.27<br>±0.17             | 15.28<br>±0.89             | 10.91<br>±0.30             | 9.75<br>±0.71              | 11.94<br>±0.14             | 10.61<br>±0.86             | 15.17<br>±1.23             | 16.73<br>±0.10             | 15.05<br>±0.31             | 15.02<br>±0.01             | 17.03<br>±0.48             | 16.82<br>±0.09             | 15.22 <sup>b</sup><br>±0.18 | 16.36 <sup>a</sup><br>±0.12 |
| Stearidonic acid         | 0.49<br>±0.05              | 0.52<br>±0.03              | 0.12<br>±0.00              | 0.14<br>±0.02              | 0.13<br>±0.01              | 0.18<br>±0.02              | 0.32<br>±0.02              | 0.26<br>±0.02              | 0.34<br>±0.01              | 0.26<br>±0.04              | 1.04<br>±0.13              | 1.14<br>±0.02              | 0.16<br>±0.03              | 0.14<br>±0.01              | 1.21<br>±0.06              | 1.04<br>±0.03              | 1.07<br>±0.01               | 1.12<br>±0.04               |
| Eicosadienoic acid (n-6) | 0.12<br>±0.01              | 0.10<br>±0.02              | 0.09<br>±0.01              | 0.06<br>±0.02              | 0.10<br>±0.02              | 0.07<br>±0.01              | 0.11<br>±0.01              | 0.08<br>±0.01              | 0.08<br>±0.00              | 0.08<br>±0.01              | 0.16<br>±0.02              | 0.10<br>±0.02              | 0.12<br>±0.02              | 0.06<br>±0.01              | 0.20<br>±0.00              | 0.19<br>±0.02              | 0.12<br>±0.00               | 0.13<br>±0.00               |
| Behenic                  | 0.18 <sup>b</sup><br>±0.02 | 0.24 <sup>a</sup><br>±0.01 | 0.10<br>±0.01              | 0.13<br>±0.01              | 0.19 <sup>a</sup><br>±0.03 | 0.12 <sup>b</sup><br>±0.02 | 0.23<br>±0.01              | 0.23<br>±0.02              | 0.23<br>±0.01              | 0.26<br>±0.00              | 0.21 <sup>b</sup><br>±0.00 | 0.28 <sup>a</sup><br>±0.00 | 0.11 <sup>b</sup><br>±0.01 | 0.14 <sup>a</sup><br>±0.01 | 0.22 <sup>b</sup><br>±0.00 | 0.26 <sup>a</sup><br>±0.00 | 0.21 <sup>b</sup><br>±0.01  | 0.28 <sup>a</sup><br>±0.01  |
| Brassidic                | 0.04<br>±0.00              | 0.05<br>±0.00              | 0.04<br>±0.00              | 0.04<br>±0.00              | 0.04<br>±0.00              | 0.04<br>±0.00              | 0.05<br>±0.00              | 0.04<br>±0.00              | 0.04<br>±0.00              | 0.05<br>±0.00              | 0.05<br>±0.00              | 0.05<br>±0.00              | 0.04<br>±0.00              | 0.04<br>±0.00              | 0.05<br>±0.00              | 0.05<br>±0.00              | 0.05<br>±0.00               | 0.05<br>±0.00               |
| Nervonic                 | 0.04 <sup>b</sup><br>±0.00 | 0.09 <sup>a</sup><br>±0.01 | 0.03 <sup>b</sup><br>±0.00 | 0.08 <sup>b</sup><br>±0.00 | 0.03 <sup>b</sup><br>±0.00 | 0.07 <sup>a</sup><br>±0.00 | 0.04 <sup>b</sup><br>±0.00 | 0.08 <sup>a</sup><br>±0.01 | 0.03 <sup>b</sup><br>±0.00 | 0.10 <sup>a</sup><br>±0.00 | 0.04 <sup>b</sup><br>±0.00 | 0.07 <sup>a</sup><br>±0.00 | 0.03 <sup>b</sup><br>±0.00 | 0.07 <sup>a</sup><br>±0.00 | 0.07<br>±0.00              | 0.07<br>±0.00              | 0.04 <sup>b</sup><br>±0.00  | 0.07 <sup>a</sup><br>±0.00  |
| Lignoceric               | 0.14 <sup>b</sup><br>±0.01 | 0.21 <sup>a</sup><br>±0.01 | 0.10<br>±0.00              | 0.10<br>±0.00              | 0.09 <sup>b</sup><br>±0.01 | 0.14 <sup>a</sup><br>±0.01 | 0.16 <sup>b</sup><br>±0.01 | 0.20 <sup>a</sup><br>±0.01 | 0.15 <sup>b</sup><br>±0.00 | 0.23 <sup>a</sup><br>±0.03 | 0.16 <sup>b</sup><br>±0.01 | 0.23 <sup>a</sup><br>±0.00 | 0.09<br>±0.00              | 0.09<br>±0.00              | 0.13 <sup>b</sup><br>±0.01 | 0.20 <sup>a</sup><br>±0.00 | 0.14 <sup>a</sup><br>±0.01  | 0.10 <sup>b</sup><br>±0.00  |
| SFA                      | 10.52                      | 11.45                      | 10.59                      | 10.88                      | 10.45                      | 10.71                      | 11.41                      | 11.51                      | 11.08                      | 11.83                      | 9.96                       | 10.21                      | 10.88                      | 11.43                      | 9.43                       | 10.20                      | 9.95                        | 10.44                       |
| MUFA                     | 14.82                      | 15.15                      | 13.62                      | 14.05                      | 13.46                      | 13.87                      | 16.64                      | 16.59                      | 15.96                      | 16.93                      | 9.83                       | 10.05                      | 13.58                      | 14.16                      | 9.87                       | 10.52                      | 11.30                       | 11.81                       |
| PUFA                     | 73.40                      | 72.14                      | 75.03                      | 74.29                      | 75.36                      | 74.50                      | 70.85                      | 70.84                      | 71.87                      | 70.17                      | 78.27                      | 77.80                      | 74.82                      | 73.70                      | 78.70                      | 77.48                      | 76.81                       | 75.88                       |
| n-3                      | 13.36                      | 12.74                      | 17.08                      | 16.17                      | 17.42                      | 16.90                      | 12.84                      | 12.14                      | 13.64                      | 12.59                      | 18.07                      | 17.92                      | 16.96                      | 16.24                      | 19.15                      | 17.97                      | 18.04                       | 17.38                       |
| n-6                      | 59.90                      | 59.29                      | 57.85                      | 58.06                      | 57.82                      | 57.52                      | 57.87                      | 58.60                      | 58.14                      | 57.47                      | 60.01                      | 59.76                      | 57.73                      | 57.40                      | 59.32                      | 59.29                      | 58.62                       | 58.36                       |
| n6/n3                    | 4.48                       | 4.65                       | 3.39                       | 3.59                       | 3.32                       | 3.40                       | 4.51                       | 4.84                       | 4.26                       | 4.57                       | 3.32                       | 3.33                       | 3.40                       | 3.53                       | 3.10                       | 3.30                       | 3.25                        | 3.36                        |
| pufa/sfa                 | 6.99                       | 6.30                       | 7.09                       | 6.84                       | 7.21                       | 6.95                       | 6.21                       | 6.16                       | 6.49                       | 5.94                       | 7.87                       | 7.62                       | 6.88                       | 6.45                       | 8.35                       | 7.60                       | 7.72                        | 7.27                        |
| pufa+mufa/sfa            | 8.40                       | 7.62                       | 8.37                       | 8.13                       | 8.50                       | 8.25                       | 7.67                       | 7.61                       | 7.93                       | 7.37                       | 8.86                       | 8.60                       | 8.13                       | 7.69                       | 9.39                       | 8.63                       | 8.85                        | 8.40                        |
| trans                    | 0.52                       | 0.45                       | 0.51                       | 0.46                       | 0.48                       | 0.59                       | 0.55                       | 0.50                       | 0.54                       | 0.50                       | 0.52                       | 0.49                       | 0.44                       | 0.40                       | 0.50                       | 0.48                       | 0.52                        | 0.46                        |

nd not detected, SFA saturated fatty acids, MUFA monounsaturated fatty acids, PUFA polyunsaturated fatty acids

**Table S2.** Volatile detected along the heat treatment for the nine oil samples. Results are expressed in area counts  $\times 10^3/\text{g}$  for each compound; the ion used for the quantification of several compounds is indicated, as well as the Kovats index for each volatile.

| Volatile compound     | Ion <sup>1</sup> | KI <sup>2</sup> | Sample 1 |       |       |       |        |        |        | Sample 2 |       |       |       |        |        |        |
|-----------------------|------------------|-----------------|----------|-------|-------|-------|--------|--------|--------|----------|-------|-------|-------|--------|--------|--------|
|                       |                  |                 | Day 0    | Day 3 | Day 6 | Day 9 | Day 12 | Day 15 | Day 18 | Day 0    | Day 3 | Day 6 | Day 9 | Day 12 | Day 15 | Day 18 |
| Alkenes               |                  |                 |          |       |       |       |        |        |        |          |       |       |       |        |        |        |
| 1-octene              |                  | 792             | 1277     | 1293  | 1145  | 1354  | 1412   | 1589   | 1642   | 251      | 775   | 1042  | 1398  | 1318   | 1371   | 251    |
| 2-(E)-octene          |                  | 808             | 4616     | 6134  | 3141  | 4627  | 5746   | 5935   | 5197   | 722      | 2308  | 3109  | 3578  | 3714   | 4454   | 522    |
| 2-(Z)-octene          |                  | 815             | 2004     | 1892  | 2096  | 2537  | 3047   | 3659   | 3619   | 1007     | 826   | 1590  | 2071  | 2766   | 2698   | 164    |
| Aldehydes             |                  |                 |          |       |       |       |        |        |        |          |       |       |       |        |        |        |
| Hexanal               |                  | 804             | 62642    | 69294 | 63908 | 62382 | 65111  | 70458  | 68678  | 46097    | 42367 | 52322 | 48300 | 56688  | 40303  | 47374  |
| (E)-2-hexenal         |                  | 850             | 1195     | 1619  | 2902  | 6815  | 6589   | 9063   | 9338   | 876      | 4832  | 7891  | 8087  | 8470   | 6904   | 8421   |
| Heptanal              |                  | 901             | 4246     | 4734  | 4823  | 4099  | 4402   | 4364   | 4506   | 2449     | 2015  | 2673  | 3312  | 3644   | 2727   | 3202   |
| (E,E)-2,4-hexadienal  | 81               | 909             | -        | 544   | 1485  | 4906  | 4488   | 6143   | 5584   | -        | 1880  | 4177  | 4951  | 4416   | 4773   | 4842   |
| (E)-2-heptenal        |                  | 954             | 4503     | 17346 | 41234 | 67046 | 61070  | 63238  | 61349  | 990      | 52483 | 73398 | 69376 | 73565  | 65314  | 61248  |
| (E,E)-2,4-heptadienal | 81               | 995             | 1259     | 5544  | 20169 | 45755 | 51556  | 42852  | 39634  | 1818     | 33207 | 52792 | 57483 | 54103  | 67017  | 57168  |
| (E,Z)-2,4-heptadienal |                  | 1009            | -        | 5529  | 10155 | 65459 | 65110  | 71301  | 81457  | 280      | 23462 | 59649 | 90353 | 118685 | 106074 | 113161 |

|                                   |      |        |        |       |       |       |       |       |       |       |       |       |       |       |       |
|-----------------------------------|------|--------|--------|-------|-------|-------|-------|-------|-------|-------|-------|-------|-------|-------|-------|
| 2-octenal                         | 1056 | 3130   | 4309   | 8989  | 28801 | 29959 | 30908 | 32614 | 1277  | 6129  | 15727 | 24999 | 21993 | 16634 | 23357 |
| Nonanal                           | 1103 | 3023   | 2538   | 2483  | 5658  | 5499  | 6451  | 7322  | 669   | 1368  | 3352  | 3712  | 5568  | 2902  | 3607  |
| Nonenal                           | 1158 | 571    | 553    | 757   | 6511  | 8159  | 18210 | 23701 | 94    | 461   | 2090  | 3724  | 3476  | 3280  | 8396  |
| 2,4-nonadi-<br>enal               | 1192 | -      | -      | -     | 1133  | 927   | 1313  | 1714  | -     | -     | 851   | 1438  | 1204  | 1116  | 1976  |
| (E,E)-2,4-<br>decadienal          | 1291 | -      | -      | 470   | 5483  | 6373  | 7440  | 8048  | -     | 502   | 2985  | 4414  | 4700  | 4244  | 6836  |
| 2,4-decadi-<br>enal               | 1317 | -      | -      | 280   | 10472 | 11805 | 15846 | 18040 | -     | 1073  | 6390  | 10912 | 11425 | 9224  | 17547 |
| <b>Ketones</b>                    |      |        |        |       |       |       |       |       |       |       |       |       |       |       |       |
| 2-hep-<br>tanone                  | 890  | 10028  | 10856  | 9246  | 6034  | 6032  | 6230  | 5972  | 3326  | 3070  | 3817  | 3627  | 3759  | 2865  | 3379  |
| 1-octen-3-<br>one                 | 977  | 1223   | 1947   | 2509  | 3993  | 3653  | 3511  | 2996  | -     | 915   | 1747  | 1812  | 2151  | 2045  | 1624  |
| 3-octen-2-<br>one                 | 1038 | 4481   | 5164   | 7430  | 12091 | 12407 | 13276 | 13174 | -     | 4065  | 7840  | 9136  | 9058  | 9011  | 10588 |
| (E,E)-3,5-oc-<br>tadien-2-<br>one | 1070 | 1858   | 6740   | 15865 | 24816 | 28097 | 21593 | 20348 | 663   | 14107 | 21482 | 21855 | 29210 | 29186 | 23179 |
| 3,5-octa-<br>dien-2-one           | 1091 | 1138   | 1747   | 6373  | 21508 | 22368 | 23413 | 26688 | 171   | 6977  | 16722 | 21333 | 20227 | 22089 | 27858 |
| <b>Alcohols</b>                   |      |        |        |       |       |       |       |       |       |       |       |       |       |       |       |
| 3-methyl-1-<br>butanol            | 727  | 154    | 120    | -     | -     | -     | -     | -     | 413   | -     | -     | -     | -     | -     | -     |
| 1-pentanol                        | 762  | 16661  | 15297  | 12239 | 6503  | 6337  | 5317  | 4308  | 6527  | 5768  | 5754  | 5258  | 5604  | 4665  | 4430  |
| 1-hexanol                         | 873  | 127496 | 106758 | 73273 | 30852 | 27493 | 21410 | 17800 | 37524 | 17140 | 9863  | 8067  | 7156  | 8564  | 5584  |

|                                |    |      |       |       |       |       |       |       |       |       |       |       |       |       |       |       |
|--------------------------------|----|------|-------|-------|-------|-------|-------|-------|-------|-------|-------|-------|-------|-------|-------|-------|
| 1-octen-3-ol                   |    | 979  | 1608  | 4010  | 13182 | 21842 | 18746 | 20333 | 20263 | 709   | 17065 | 22550 | 21252 | 21931 | 16945 | 14509 |
| <b>Acids</b>                   |    |      |       |       |       |       |       |       |       |       |       |       |       |       |       |       |
| Propionic acid                 | 74 | 726  | -     | -     | 13199 | 15285 | 14945 | 13531 | 13164 | 158   | 10719 | 16437 | 16517 | 24198 | 17579 | 16839 |
| Butanoic acid                  | 60 | 801  | 11687 | 16246 | 15639 | 10532 | 9512  | 8953  | 8666  | 13247 | 14244 | 11665 | 10075 | 12459 | 10914 | 8776  |
| Pentanoic acid                 | 60 | 904  | 6145  | 6327  | 7149  | 7497  | 7545  | 7370  | 7345  | 1029  | 2050  | 4143  | 3957  | 4648  | 3121  | 4181  |
| Hexanoic acid                  | 60 | 992  | 32923 | 45230 | 51900 | 59979 | 59261 | 58943 | 58810 | 4441  | 10707 | 18202 | 26236 | 20660 | 19617 | 29525 |
| Heptanoic acid                 | 60 | 1082 | 2259  | 7385  | 9186  | 10161 | 9096  | 9633  | 9526  | 213   | 3644  | 4408  | 4205  | 4986  | 4341  | 4154  |
| <b>Furans derivatives</b>      |    |      |       |       |       |       |       |       |       |       |       |       |       |       |       |       |
| 2-pentyl-furan                 | 81 | 991  | 21427 | 12458 | 16002 | 47213 | 38143 | 56228 | 58561 | -     | 9813  | 26200 | 27308 | 33666 | 16635 | 27634 |
| <b>Terpenes</b>                |    |      |       |       |       |       |       |       |       |       |       |       |       |       |       |       |
| $\alpha$ -pinene               |    | 929  | 8604  | 7685  | 5571  | 2817  | 2650  | 2344  | 2283  | 36608 | 16750 | 9966  | 8512  | 7865  | 9372  | 7005  |
| $\beta$ -pinene                |    | 971  | 3074  | 2695  | 2596  | 1238  | 1458  | 1235  | 1251  | 19832 | 10076 | 6400  | 5776  | 5175  | 6395  | 4899  |
| $\delta$ -3-carene             | 93 | 1006 | 949   | 908   | 778   | 441   | 415   | 387   | 358   | 1932  | 1326  | 962   | 742   | 669   | 858   | 632   |
| <i>para</i> -cymene            | 93 | 1021 | 2566  | 2616  | 2456  | 1654  | 1497  | 1527  | 1523  | 1427  | 1597  | 1724  | 1913  | 2134  | 1942  | 5439  |
| Limonene                       |    | 1025 | 2971  | 2445  | 2102  | 1715  | 1633  | 1537  | 1566  | 17951 | 13712 | 12257 | 10593 | 10345 | 11033 | 10060 |
| ( <i>E</i> )- $\beta$ -ocimene |    | 1047 | 2232  | 1757  | 2200  | 1902  | 1768  | 1788  | 1797  | 2794  | 2598  | 2515  | 2421  | 2168  | 2540  | 2127  |
| Terpinolene                    |    | 1085 | 5239  | 3585  | 2495  | 1672  | 965   | 1467  | 1296  | 4182  | 4473  | 3855  | 2696  | 3025  | 3016  | 3093  |

|                                                          |                  |                 |          |       |       |       |        |        |        |          |       |       |       |        |        |        |
|----------------------------------------------------------|------------------|-----------------|----------|-------|-------|-------|--------|--------|--------|----------|-------|-------|-------|--------|--------|--------|
| (E)-caryo-<br>phyllene<br>Bergamo-<br>tene (iso-<br>mer) |                  |                 |          |       |       |       |        |        |        |          |       |       |       |        |        |        |
|                                                          | 1420             | 1264            | 1175     | 1140  | 619   | 482   | 456    | 475    |        | 967      | 1005  | 858   | 515   | 695    | 548    | 375    |
|                                                          | 1439             | 172             | 160      | 173   | 196   | 162   | 191    | 204    |        | 70       | 241   | 63    | 312   | 90     | 95     | 95     |
| Volatile                                                 |                  |                 |          |       |       |       |        |        |        | Sample 4 |       |       |       |        |        |        |
| com-<br>pound                                            | Ion <sup>1</sup> | KI <sup>2</sup> | Sample 3 |       |       |       |        |        |        |          |       |       |       |        |        |        |
|                                                          |                  |                 | Day 0    | Day 3 | Day 6 | Day 9 | Day 12 | Day 15 | Day 18 | Day 0    | Day 3 | Day 6 | Day 9 | Day 12 | Day 15 | Day 18 |
| Alkenes                                                  |                  |                 |          |       |       |       |        |        |        |          |       |       |       |        |        |        |
| 1-octene                                                 |                  | 792             | 1813     | 1184  | 1296  | 1108  | 1243   | 1453   | 1585   | 2701     | 577   | 845   | 1111  | 1258   | 1260   | 1930   |
| 2-(E)-oc-<br>tene                                        |                  | 808             | 4280     | 3929  | 3079  | 3331  | 4092   | 4385   | 3853   | 4684     | 2679  | 3437  | 4267  | 4742   | 3851   | 2197   |
| 2-(Z)-oc-<br>tene                                        |                  | 815             | 3867     | 2183  | 2427  | 2181  | 2323   | 3011   | 3088   | 3209     | 1583  | 2277  | 2631  | 3080   | 2843   | 4276   |
| Alde-<br>hydes                                           |                  |                 |          |       |       |       |        |        |        |          |       |       |       |        |        |        |
| Hexanal                                                  |                  | 804             | 18512    | 43587 | 39625 | 36235 | 36835  | 37284  | 42003  | 33222    | 50275 | 60870 | 70953 | 72552  | 77201  | 113722 |
| (E)-2-<br>hexenal                                        |                  | 850             | 915      | 4321  | 6535  | 4721  | 5083   | 6138   | 7460   | 1383     | 5640  | 6589  | 8147  | 9014   | 9747   | 14231  |
| Heptanal                                                 |                  | 901             | 1256     | 2220  | 1970  | 1764  | 1776   | 1747   | 2951   | 1249     | 2372  | 3043  | 3760  | 3596   | 4233   | 5728   |
| (E,E)-2,4-<br>hexadi-<br>enal                            | 81               | 909             | 62       | 1603  | 2634  | 2365  | 2454   | 3498   | 4009   | 236      | 5174  | 6415  | 6260  | 6185   | 5485   | 9277   |
| (E)-2-<br>heptenal                                       |                  | 954             | 907      | 61914 | 70486 | 58127 | 55930  | 54667  | 57562  | 3971     | 81176 | 84493 | 75316 | 77349  | 71335  | 101564 |

|                          |    |      |      |       |       |       |       |       |        |      |       |       |       |       |       |        |
|--------------------------|----|------|------|-------|-------|-------|-------|-------|--------|------|-------|-------|-------|-------|-------|--------|
| (E,E)-2,4-heptadienal    | 81 | 995  | 1885 | 40069 | 60777 | 66743 | 62208 | 69072 | 63409  | 1190 | 51001 | 52411 | 44562 | 42380 | 33372 | 47128  |
| (E,Z)-2,4-heptadienal    |    | 1009 | 85   | 31430 | 71900 | 64371 | 57550 | 4817  | 108082 | 3704 | 49285 | 64707 | 76372 | 75684 | 82854 | 127569 |
| 2-octenal                |    | 1056 | -    | 7252  | 12287 | 12174 | 10414 | 14083 | 3208   | -    | 20072 | 28284 | 29722 | 28473 | 28097 | 41185  |
| Nonanal                  |    | 1103 | 434  | 1277  | 2108  | 1734  | 1654  | 2341  | 3281   | 787  | 3218  | 5343  | 6624  | 6317  | 7206  | 11341  |
| Nonenal                  |    | 1158 | 149  | 565   | 1602  | 1378  | 1357  | 3736  | 7821   | -    | 1685  | 5980  | 18355 | 23332 | 36120 | 62660  |
| 2,4-nonadienal           |    | 1192 | -    | -     | -     | 316   | 404   | 906   | 1577   | -    | 1245  | 2253  | 3023  | 2906  | 3325  | 4539   |
| (E,E)-2,4-decadienal     |    | 1291 | -    | 659   | 2834  | 2792  | 2670  | 416   | 6349   | -    | 3436  | 5651  | 7636  | 7270  | 8080  | 13724  |
| 2,4-decadienal           |    | 1317 | -    | 1242  | 6417  | 5709  | 5061  | 894   | 15717  | -    | 5690  | 11602 | 18035 | 17138 | 21547 | 37008  |
| <b>Ketones</b>           |    |      |      |       |       |       |       |       |        |      |       |       |       |       |       |        |
| 2-heptanone              |    | 890  | 1963 | 3001  | 2689  | 2647  | 2679  | 2824  | 3290   | 1904 | 2593  | 2680  | 3376  | 2989  | 2352  | 5247   |
| 1-octen-3-one            |    | 977  | -    | 854   | 1279  | 926   | 990   | 1047  | 1205   | 434  | 2565  | 3720  | 3185  | 2898  | 2216  | 2972   |
| 3-octen-2-one            |    | 1038 | -    | 4949  | 7876  | 7697  | 7381  | 10250 | 12408  | -    | 5994  | 7798  | 9360  | 4954  | 5028  | 7532   |
| (E,E)-3,5-octadien-2-one |    | 1070 | 823  | 20630 | 27603 | 36844 | 35491 | 34646 | 30849  | 1593 | 20383 | 20905 | 18098 | 16381 | 13645 | 20819  |

[illegible]



|                              |                  |                 |       |       |       |       |        |        |        |          |       |       |       |        |        |        |
|------------------------------|------------------|-----------------|-------|-------|-------|-------|--------|--------|--------|----------|-------|-------|-------|--------|--------|--------|
| 2-pentyl-<br>furan           | 81               | 991             | -     | 9828  | 18992 | 13407 | 11983  | 16727  | 27386  | -        | 20347 | 29070 | 43481 | 44434  | 60081  | 85247  |
| Ter-<br>penes                |                  |                 |       |       |       |       |        |        |        |          |       |       |       |        |        |        |
| α-pinene                     |                  | 929             | 39742 | 16676 | 10855 | 11313 | 12656  | 9158   | 6687   | 70091    | 33273 | 28899 | 25953 | 24912  | 22770  | 24780  |
| β-pinene                     |                  | 971             | 21577 | 10496 | 7881  | 7749  | 8763   | 6424   | 4889   | 29314    | 14308 | 7881  | 7749  | 10458  | 9731   | 12598  |
| δ-3-<br>carene               | 93               | 1006            | 1613  | 1078  | 829   | 870   | 899    | 686    | 4804   | 2333     | 829   | 870   | 1624  | 1502   | 2005   | 4804   |
| para-cy-<br>mene             | 93               | 1021            | 1531  | 1826  | 1869  | 1805  | 1646   | 2004   | 5211   | 7161     | 6552  | 6321  | 10209 | 5503   | 4862   | 12953  |
| Limo-<br>nene                |                  | 1025            | 19949 | 15338 | 13172 | 13512 | 14209  | 11845  | 12086  | 33134    | 21513 | 18413 | 16817 | 15904  | 14599  | 20296  |
| (E)-β -<br>ocimene           |                  | 1047            | 5140  | 4478  | 4313  | 4664  | 4800   | 3809   | 3413   | 20345    | 12977 | 11450 | 10313 | 9768   | 8633   | 13830  |
| Terpino-<br>lene             |                  | 1085            | 6917  | 6248  | 5511  | 6032  | 6350   | 4667   | 4280   | 32112    | 20087 | 15183 | 13610 | 11707  | 12353  | 18091  |
| (E)-cary-<br>o-<br>phyllene  |                  | 1420            | 3035  | 3124  | 2510  | 2490  | 2507   | 1760   | 1424   | 40220    | 25171 | 17609 | 13715 | 11218  | 11043  | 17289  |
| Berga-<br>motene<br>(isomer) |                  | 1439            | 255   | 617   | 591   | 332   | 385    | 303    | 302    | 4543     | 4707  | 4559  | 4556  | 4060   | 4224   | 6710   |
| Volatile                     | Sample 5         |                 |       |       |       |       |        |        |        | Sample 6 |       |       |       |        |        |        |
| com-<br>pound                | Ion <sup>1</sup> | KI <sup>2</sup> | Day 0 | Day 3 | Day 6 | Day 9 | Day 12 | Day 15 | Day 18 | Day 0    | Day 3 | Day 6 | Day 9 | Day 12 | Day 15 | Day 18 |
| Alkenes                      |                  |                 |       |       |       |       |        |        |        |          |       |       |       |        |        |        |
| 1-octene                     |                  | 792             | 1828  | 651   | 752   | 941   | 1120   | 977    | 74     | 1803     | 6551  | 2475  | 3058  | 3551   | 3760   | 3874   |

|                       |    |      |       |       |       |       |       |       |        |       |       |       |       |        |        |        |
|-----------------------|----|------|-------|-------|-------|-------|-------|-------|--------|-------|-------|-------|-------|--------|--------|--------|
| 2-(E)-octene          |    | 808  | 936   | 2143  | 2475  | 2587  | 3452  | 3029  | 5311   | 4874  | 2645  | 5946  | 8575  | 9119   | 10416  | 10730  |
| 2-(Z)-octene          |    | 815  | -     | -     | 1191  | 1320  | 2117  | 1790  | 3329   | -     | 2083  | 5137  | 7105  | 8182   | 9056   | 8403   |
| <b>Aldehydes</b>      |    |      |       |       |       |       |       |       |        |       |       |       |       |        |        |        |
| Hexanal               |    | 804  | 30184 | 50535 | 65699 | 76635 | 86329 | 86925 | 135559 | 65268 | 43505 | 58679 | 66388 | 61232  | 62012  | 60217  |
| (E)-2-hexenal         |    | 850  | 731   | 3625  | 5409  | 6849  | 8513  | 9274  | 13882  | 1437  | 3040  | 7256  | 8333  | 9443   | 10422  | 10836  |
| Heptanal              |    | 901  | 1415  | 2251  | 3122  | 3495  | 3885  | 3997  | 6164   | 2394  | 1985  | 3427  | 4630  | 4459   | 4168   | 4313   |
| (E,E)-2,4-hexadienal  | 81 | 909  | 153   | 4695  | 7762  | 6902  | 6008  | 5045  | 7871   | 132   | 2043  | 6728  | 7320  | 8290   | 8005   | 7255   |
| (E)-2-heptenal        |    | 954  | -     | 50166 | 76728 | 62160 | 67507 | 52341 | 86424  | 5379  | 38130 | 77400 | 82767 | 76619  | 83701  | 82125  |
| (E,E)-2,4-heptadienal | 81 | 995  | 1117  | 30293 | 45472 | 40711 | 35613 | 32034 | 40163  | 1582  | 26727 | 82702 | 90501 | 89239  | 88743  | 81878  |
| (E,Z)-2,4-heptadienal |    | 1009 | 1361  | 24196 | 49169 | 56690 | 60072 | 60659 | 98646  | 1582  | 1344  | 20696 | 91259 | 131287 | 146401 | 152645 |
| 2-octenal             |    | 1056 | 3969  | 9451  | 20447 | 22110 | 21708 | 19919 | 34539  | 3070  | 7865  | 25155 | 39953 | 32497  | 34397  | 36152  |
| Nonanal               |    | 1103 | 681   | 2793  | 5618  | 6850  | 7745  | 7418  | 12612  | 1510  | 1531  | 3355  | 5329  | 5452   | 5691   | 6174   |
| Nonenal               |    | 1158 | -     | -     | 3981  | 17202 | 32996 | 42259 | 76043  | 342   | 546   | 2597  | 6015  | 8091   | 9978   | 13503  |
| 2,4-nonadienal        |    | 1192 | -     | 653   | 1956  | 350   | 2463  | 2335  | 4134   | -     | -     | -     | -     | -      | -      | -      |

|                          |      |      |       |       |       |       |       |       |       |       |       |       |       |       |       |
|--------------------------|------|------|-------|-------|-------|-------|-------|-------|-------|-------|-------|-------|-------|-------|-------|
| (E,E)-2,4-decadienal     | 1291 | -    | -     | 3526  | 252   | 5209  | 5303  | 9018  | -     | 674   | 6494  | 10145 | 11443 | 12164 | 13664 |
| 2,4-decadienal           | 1317 | -    | 691   | 6411  | 412   | 11617 | 12747 | 23246 | -     | 580   | 9452  | 18965 | 22307 | 24000 | 28665 |
| <b>Ketones</b>           |      |      |       |       |       |       |       |       |       |       |       |       |       |       |       |
| 2-heptanone              | 890  | 2774 | 3272  | 3642  | 3795  | 3920  | 3685  | 5305  | 4133  | 3713  | 4775  | 5539  | 5174  | 5264  | 5268  |
| 1-octen-3-one            | 977  |      | 2336  | 4155  | 3109  | 3632  | 2111  | 3126  | 670   | 1744  | 5130  | 6345  | 5831  | 5438  | 670   |
| 3-octen-2-one            | 1038 | 8830 | 14920 | 19857 | 19729 | 19248 | 17501 | 25385 | 3560  | 5073  | 11159 | 13128 | 13666 | 13395 | 14816 |
| (E,E)-3,5-octadien-2-one | 1070 | 2874 | 32801 | 38290 | 34437 | 28264 | 26673 | 35660 | -     | 13663 | 33987 | 30987 | 32474 | 29680 | 28451 |
| 3,5-octadien-2-one       | 1091 | -    | 17070 | 26442 | 30243 | 29318 | 30739 | 51107 | -     | 5144  | 5792  | 7397  | 6391  | 7756  | 8163  |
| <b>Alcohols</b>          |      |      |       |       |       |       |       |       |       |       |       |       |       |       |       |
| 3-methyl-1-butanol       | 727  | 651  | -     | -     | -     | -     | -     | -     | 309   | -     | -     | -     | -     | -     | -     |
| 1-pentanol               | 762  | 3644 | 4367  | 4178  | 3624  | 3044  | 2455  | 3165  | 7892  | 6329  | 8002  | 7680  | 7468  | 6475  | 6057  |
| 1-hexanol                | 873  | 9284 | 3635  | 2039  | 1572  | 1254  | 949   | 1112  | 69264 | 39831 | 32579 | 24861 | 24459 | 22543 | 19254 |
| 1-octen-3-ol             | 979  | 2572 | 12478 | 22154 | 19264 | 20222 | 16113 | 23387 | 2290  | 13513 | 29462 | 30129 | 28770 | 29305 | 28613 |

|                                     |    |      |       |       |       |       |       |       |       |       |       |       |       |       |       |       |
|-------------------------------------|----|------|-------|-------|-------|-------|-------|-------|-------|-------|-------|-------|-------|-------|-------|-------|
| <b>Acids</b>                        |    |      |       |       |       |       |       |       |       |       |       |       |       |       |       |       |
| Propi-<br>onic acid                 | 74 | 726  | -     | 12626 | 14204 | 13957 | 9988  | 12532 | 17467 | -     | 5310  | 16659 | 18356 | 19523 | 19563 | 18378 |
| Butanoic<br>acid                    | 60 | 801  | 3949  | 3444  | 3404  | 3295  | 3313  | 3031  | 4589  | 3713  | 7184  | 9811  | 9575  | 9506  | 9271  | 8409  |
| Penta-<br>noic acid                 | 60 | 904  | 1079  | 2656  | 3682  | 3897  | 4040  | 3638  | 5929  | 1429  | 2372  | 4582  | 7113  | 6214  | 6351  | 6341  |
| Hexa-<br>noic acid                  | 60 | 992  | 4592  | 17432 | 26420 | 28720 | 28559 | 27045 | 42971 | 8901  | 15882 | 33774 | 46393 | 43028 | 43955 | 46407 |
| Hep-<br>tanoic<br>acid              | 60 | 1082 | 190   | 2713  | 3437  | 3493  | 3369  | 3437  | 5595  | 127   | 2294  | 4573  | 5005  | 4699  | 4838  | 5053  |
| <b>Furans<br/>deriva-<br/>tives</b> |    |      |       |       |       |       |       |       |       |       |       |       |       |       |       |       |
| 2-pentyl-<br>furan                  | 81 | 991  | -     | -     | 28035 | 40424 | 49725 | 54352 | 88260 | 8112  | 10601 | 24205 | 33614 | 33640 | 33493 | 35289 |
| <b>Ter-<br/>penes</b>               |    |      |       |       |       |       |       |       |       |       |       |       |       |       |       |       |
| $\alpha$ -pinene                    |    | 929  | 81883 | 50323 | 38111 | 34399 | 32598 | 31246 | 32083 | 25534 | 16780 | 16202 | 12999 | 12753 | 12760 | 11578 |
| $\beta$ -pinene                     |    | 971  | 34338 | 21088 | 33977 | 14210 | 13524 | 12578 | 17188 | 11673 | 8979  | 8566  | 7352  | 6981  | 6720  | 5898  |
| $\delta$ -3-<br>carene              | 93 | 1006 | 5332  | 3454  | 2383  | 2183  | 2052  | 1886  | 2508  | 4293  | 3386  | 3441  | 2739  | 2756  | 2714  | 2490  |
| <i>para</i> -cy-<br>mene            | 93 | 1021 | 8861  | 8344  | 12155 | 11202 | 11150 | 10108 | 15196 | 2403  | 2471  | 2737  | 7913  | 8437  | 8023  | 7591  |
| Limo-<br>nene                       |    | 1025 | 37132 | 28761 | 23595 | 21941 | 18755 | 17969 | 24241 | 12974 | 11255 | 13393 | 13903 | 13036 | 12983 | 15517 |

|                              |                  |                 |          |       |       |       |           |           |          |          |       |       |       |        |        |        |
|------------------------------|------------------|-----------------|----------|-------|-------|-------|-----------|-----------|----------|----------|-------|-------|-------|--------|--------|--------|
| (E)-β -<br>ocimene           | 1047             | -               | 15950    | 13635 | 12468 | 11328 | 10283     | 14804     | 8112     | 6624     | 8362  | 7126  | 7058  | 6987   | 6633   |        |
| Terpino-<br>lene             | 1085             | 27185           | 21154    | 13141 | 12752 | 11246 | 11995     | 16788     | 11500    | 10156    | 12281 | 10230 | 11108 | 10329  | 9709   |        |
| (E)-cary-<br>o-<br>phyllene  | 1420             | 53095           | 39526    | 25080 | 20313 | 16643 | 15627     | 24710     | 1304     | 1212     | 1598  | 1387  | 1261  | 1103   | 1065   |        |
| Berga-<br>motene<br>(isomer) | 1439             | 6050            | 6402     | 6602  | 6500  | 6016  | 5804      | 9584      | -        | -        | -     | -     | -     | -      | -      |        |
| Volatile<br>com-<br>pound    | Ion <sup>1</sup> | KI <sup>2</sup> | Sample 7 |       |       |       |           |           | Sample 8 |          |       |       |       |        |        |        |
|                              |                  |                 | Day<br>0 | Day 3 | Day 6 | Day 9 | Day<br>12 | Day<br>15 | Day 18   | Day<br>0 | Day 3 | Day 6 | Day 9 | Day 12 | Day 15 | Day 18 |
| Alkenes                      |                  |                 |          |       |       |       |           |           |          |          |       |       |       |        |        |        |
| 1-octene                     | 792              | 378             | 761      | 1521  | 1997  | 2287  | 2372      | 2557      | 1946     | 1499     | 2640  | 3293  | 3133  | 3985   | 4388   |        |
| 2-(E)-oc-<br>tene            | 808              | 3839            | 2821     | 4207  | 4022  | 4796  | 5086      | 5613      | 3810     | 2447     | 5999  | 7828  | 8410  | 11830  | 12774  |        |
| 2-(Z)-oc-<br>tene            | 815              | 2859            | 1322     | 3100  | 3325  | 4097  | 4243      | 4325      | 2235     | 2024     | 5001  | 6808  | 7640  | 9393   | 9944   |        |
| Alde-<br>hydes               |                  |                 |          |       |       |       |           |           |          |          |       |       |       |        |        |        |
| Hexanal                      | 804              | 24168           | 36898    | 46876 | 48812 | 51229 | 50944     | 52120     | 60005    | 51230    | 54850 | 54741 | 57499 | 58360  | 59456  |        |
| (E)-2-<br>hexenal            | 850              | 432             | 3872     | 9704  | 10950 | 11847 | 11462     | 11856     | 1837     | 3997     | 6698  | 7637  | 8128  | 10119  | 10957  |        |
| Heptanal                     | 901              | 1255            | 1776     | 2402  | 3537  | 3783  | 3576      | 3927      | 2227     | 2280     | 3112  | 2974  | 3516  | 3870   | 4177   |        |

|                       |    |      |      |       |        |        |        |        |        |      |       |       |        |        |        |        |
|-----------------------|----|------|------|-------|--------|--------|--------|--------|--------|------|-------|-------|--------|--------|--------|--------|
| (E,E)-2,4-hexadienal  | 81 | 909  | -    | 1148  | 4068   | 5170   | 5355   | 4683   | 5428   | -    | 3562  | 8007  | 8490   | 8305   | 9347   | 8200   |
| (E)-2-heptenal        |    | 954  | 2140 | 23761 | 63186  | 75377  | 78766  | 75165  | 77298  | 5134 | 27579 | 58354 | 69304  | 78179  | 79883  | 79724  |
| (E,E)-2,4-heptadienal | 81 | 995  | 9979 | 40753 | 87515  | 85008  | 80969  | 80211  | 72908  | 946  | 36200 | 81852 | 90816  | 89396  | 88156  | 83870  |
| (E,Z)-2,4-heptadienal |    | 1009 | 1875 | 33626 | 112457 | 151247 | 159055 | 165147 | 165689 | -    | 23797 | 90460 | 119781 | 135477 | 161530 | 169121 |
| 2-octenal             |    | 1056 | 1079 | 7334  | 16878  | 23822  | 25219  | 23744  | 23372  | 2614 | 8049  | 25704 | 28423  | 35442  | 34154  | 35708  |
| Nonanal               |    | 1103 | -    | 1275  | 2957   | 4180   | 4345   | 4266   | 3974   | 971  | 1517  | 3405  | 4560   | 5160   | 6157   | 6410   |
| Nonenal               |    | 1158 | -    | 244   | 2171   | 5635   | 7905   | 8471   | 10446  | -    | -     | 2107  | 4150   | 6520   | 10393  | 13011  |
| 2,4-nonadienal        |    | 1192 | -    | -     | -      | -      | 2040   | 2284   | 2178   | -    | -     | 1297  | 2095   | 2186   | 2860   | 2892   |
| (E,E)-2,4-decadienal  |    | 1291 | -    | 646   | 5147   | 8937   | 9485   | 9968   | 9939   | -    | -     | 5788  | 9226   | 10514  | 12393  | 12213  |
| 2,4-decadienal        |    | 1317 | -    | 1132  | 11904  | 24118  | 27321  | 27806  | 29263  | -    | -     | 8760  | 11197  | 19088  | 25023  | 26269  |
| <b>Ketones</b>        |    |      |      |       |        |        |        |        |        |      |       |       |        |        |        |        |
| 2-heptanone           |    | 890  | -    | -     | -      | -      | -      | -      | -      | 4521 | 4124  | 4245  | 3996   | 4735   | 4748   | 5080   |
| 1-octen-3-one         |    | 977  | -    | 751   | 2689   | 2110   | 2259   | 2223   | 1994   | 630  | 2841  | 6662  | 7158   | 5882   | 5621   | 6199   |

|                          |      |      |       |       |       |       |       |       |       |       |       |       |       |       |       |
|--------------------------|------|------|-------|-------|-------|-------|-------|-------|-------|-------|-------|-------|-------|-------|-------|
| 3-octen-2-one            | 1038 | -    | 5439  | 12869 | 15604 | 16346 | 17361 | 17096 | 3038  | 5422  | 10420 | 11890 | 12584 | 14655 | 14841 |
| (E,E)-3,5-octadien-2-one | 1070 | 1757 | 21059 | 37683 | 33590 | 31161 | 33649 | 29854 | -     | 21198 | 33109 | 35257 | 34797 | 32023 | 29639 |
| 3,5-octadien-2-one       | 1091 | -    | 1972  | 3901  | 4487  | 5340  | 5823  | 4952  | -     | -     | 5299  | 27034 | 31531 | 36711 | 36599 |
| <b>Alcohols</b>          |      |      |       |       |       |       |       |       |       |       |       |       |       |       |       |
| 3-methyl-1-butanol       | 727  | 355  | 992   | 1942  | 1314  | 2415  | 4197  | 2240  | 878   | 653   | 2740  | 2354  | 2185  | 2545  | 2561  |
| 1-pentanol               | 762  | 2559 | 4737  | 5931  | 5592  | 5691  | 5192  | 5053  | 12016 | 8386  | 7701  | 6626  | 6379  | 6035  | 5372  |
| 1-hexanol                | 873  | 7356 | 3546  | 3720  | 3035  | 3002  | 2927  | 2868  | 80186 | 42281 | 21665 | 18282 | 16293 | 15178 | 14127 |
| 1-octen-3-ol             | 979  | -    | 16919 | 32162 | 30591 | 29827 | 27681 | 26454 | 2142  | 17502 | 30694 | 29852 | 28183 | 29956 | 30309 |
| <b>Acids</b>             |      |      |       |       |       |       |       |       |       |       |       |       |       |       |       |
| Propionic acid           | 74   | 726  | -     | 13735 | 25075 | 26391 | 25235 | 27130 | -     | 7596  | 16197 | 18794 | 20044 | 20632 | 20114 |
| Butanoic acid            | 60   | 801  | 6339  | 9416  | 11484 | 10373 | 10263 | 10343 | 5426  | 8859  | 8158  | 8037  | 7736  | 8088  | 7879  |
| Pentanoic acid           | 60   | 904  | 190   | 1684  | 3678  | 5031  | 5342  | 5130  | 1194  | 2180  | 4157  | 4391  | 5219  | 5339  | 5660  |
| Hexanoic acid            | 60   | 992  | 808   | 7875  | 19197 | 28634 | 30327 | 30732 | 4806  | 13661 | 27517 | 32232 | 37820 | 38863 | 40626 |

|                              |    |      |       |      |       |       |       |       |  |       |       |       |       |       |       |       |       |
|------------------------------|----|------|-------|------|-------|-------|-------|-------|--|-------|-------|-------|-------|-------|-------|-------|-------|
| Hep-<br>tanoic<br>acid       | 60 | 1082 | -     | 1739 | 3623  | 3344  | 3395  | 3295  |  | 2968  | -     | 2297  | 3082  | 3623  | 3682  | 3643  | 3705  |
| Furans<br>deriva-<br>tives   |    |      |       |      |       |       |       |       |  |       |       |       |       |       |       |       |       |
| 2-pentyl-<br>furan           | 81 | 991  | -     | -    | 24547 | 37736 | 40499 | 37063 |  | 39376 | -     | -     | 19575 | 23073 | 27203 | 28120 | 32105 |
| Ter-<br>penes                |    |      |       |      |       |       |       |       |  |       |       |       |       |       |       |       |       |
| α-pinene                     |    | 929  | 21406 | 8292 | 8398  | 7109  | 6738  | 6808  |  | 6507  | 50728 | 27569 | 15353 | 13131 | 12761 | 11375 | 11467 |
| β-pinene                     |    | 971  | 10351 | 5330 | 5966  | 5057  | 5041  | 5095  |  | 4523  | 17312 | 11005 | 6722  | 5522  | 5636  | 4921  | 4789  |
| δ-3-<br>carene               | 93 | 1006 | 1509  | 1001 | 1097  | 919   | 862   | 889   |  | 836   | 11113 | 8034  | 4967  | 4414  | 4121  | 3867  | 3766  |
| para-cy-<br>mene             | 93 | 1021 | 938   | 941  | 1465  | 1608  | 1621  | 1640  |  | 1499  | 3698  | 4220  | 3994  | 3700  | 9919  | 10572 | 9325  |
| Limo-<br>nene                |    | 1025 | 8737  | 7763 | 9698  | 8924  | 8775  | 8993  |  | 8040  | 18220 | 16025 | 12504 | 11572 | 11829 | 10889 | 10328 |
| (E)-β -<br>ocimene           |    | 1047 | -     | -    | -     | -     | -     | -     |  | -     | 13406 | 12259 | 9717  | 9981  | 9806  | 7904  | 7717  |
| Terpino-<br>lene             |    | 1085 | 4346  | 3727 | 4865  | 4463  | 4461  | 4685  |  | 4766  | -     | -     | -     | -     | -     | -     | -     |
| (E)-cary-<br>o-<br>phyllene  |    | 1420 | 1023  | 980  | 1352  | 1132  | 1032  | 1009  |  | 862   | 1689  | 1679  | 1248  | 1206  | 1084  | 919   | 820   |
| Berga-<br>motene<br>(isomer) |    | 1439 | -     | -    | -     | -     | -     | -     |  | -     | -     | -     | -     | -     | -     | -     | -     |



| Volatile<br>com-<br>pound      | Ion <sup>1</sup> | KI <sup>2</sup> | Sample 9 |       |        |        |        |           |           |
|--------------------------------|------------------|-----------------|----------|-------|--------|--------|--------|-----------|-----------|
|                                |                  |                 | Day 0    | Day 3 | Day 6  | Day 9  | Day 12 | Day<br>15 | Day<br>18 |
| Alkenes                        |                  |                 |          |       |        |        |        |           |           |
| 1-octene                       |                  | 792             | 21722    | 8095  | 4945   | 4387   | 4750   | 4845      | 4653      |
| 2-(E)-oc-<br>tene              |                  | 808             | 83333    | 31320 | 14022  | 17435  | 18800  | 20483     | 19748     |
| 2-(Z)-oc-<br>tene              |                  | 815             | 70800    | 25639 | 15690  | 13620  | 13949  | 15204     | 14898     |
| Alde-<br>hydes                 |                  |                 |          |       |        |        |        |           |           |
| Hexanal                        |                  | 804             | 46589    | 52164 | 65886  | 86575  | 87469  | 102370    | 111396    |
| (E)-2-<br>hexenal              |                  | 850             | 3893     | 4147  | 3758   | 1214   | 7265   | 10031     | 12534     |
| Heptanal                       |                  | 901             | 2974     | 2231  | 2421   | 2708   | 2871   | 2918      | 3722      |
| (E,E)-2,4-<br>hexadi-<br>enal  | 81               | 909             | -        | 1658  | 5366   | 8520   | 8717   | 10242     | 11128     |
| (E)-2-<br>heptenal             |                  | 954             | 73582    | 85798 | 73737  | 65516  | 60403  | 63992     | 65532     |
| (E,E)-2,4-<br>heptadi-<br>enal | 81               | 995             | 41761    | 99891 | 137971 | 127719 | 130425 | 121482    | 85322     |
| (E,Z)-2,4-<br>heptadi-<br>enal |                  | 1009            | 9402     | 48862 | 113429 | 166438 | 168800 | 193527    | 216637    |

|                                  |      |      |       |       |        |        |        |        |
|----------------------------------|------|------|-------|-------|--------|--------|--------|--------|
| 2-octenal                        | 1056 | 2304 | 27628 | 94503 | 133690 | 145154 | 153966 | 140736 |
| Nonanal                          | 1103 | 116  | 2726  | 3703  | 5837   | 5882   | 6341   | 6846   |
| Nonenal                          | 1158 | -    | 1644  | 4005  | 5678   | 15996  | 22773  | 35679  |
| 2,4-non-<br>adienal              | 1192 | -    | -     | -     | -      | -      | -      | -      |
| (E,E)-2,4-<br>decadi-<br>enal    | 1291 | -    | 4612  | 10720 | 16151  | 17418  | 16500  | 15784  |
| 2,4-deca-<br>dienal              | 1317 | -    | 3578  | 8669  | 25742  | 26684  | 27589  | 33994  |
| <b>Ketones</b>                   |      |      |       |       |        |        |        |        |
| 2-hep-<br>tanone                 | 890  | 658  | 2129  | -     | -      | -      | -      | -      |
| 1-octen-<br>3-one                | 977  | 1498 | 1331  | 2692  | 2671   | 2027   | 1725   | 1135   |
| 3-octen-<br>2-one                | 1038 | -    | -     | -     | -      | -      | -      | -      |
| (E,E)-3,5-<br>octadien-<br>2-one | 1070 | -    | 6107  | 10854 | 13154  | 13577  | 13258  | 9353   |
| 3,5-octa-<br>dien-2-<br>one      | 1091 | -    | 1860  | 5527  | 8697   | 8909   | 10079  | 12428  |
| <b>Alcohols</b>                  |      |      |       |       |        |        |        |        |
| 3-me-<br>thyl-1-<br>butanol      | 727  | -    | -     | -     | -      | -      | -      | -      |

|                                     |    |      |      |       |       |       |       |       |       |
|-------------------------------------|----|------|------|-------|-------|-------|-------|-------|-------|
| 1-penta-<br>nol                     |    | 762  | 553  | -     | -     | -     | -     | -     | -     |
| 1-hexa-<br>nol                      |    | 873  | 1304 | 1468  | 1462  | 1214  | 1211  | 1294  | 1333  |
| 1-octen-<br>3-ol                    |    | 979  | 746  | 17601 | 22170 | 23444 | 20931 | 22510 | 24124 |
| <b>Acids</b>                        |    |      | -    |       |       |       |       |       |       |
| Propi-<br>onic acid                 | 74 | 726  |      | 3561  | 7260  | 8935  | 8932  | 10049 | 8685  |
| Butanoic<br>acid                    | 60 | 801  | 3497 | 4558  | 4129  | 4009  | 3745  | 4129  | 3811  |
| Penta-<br>noic acid                 | 60 | 904  | 408  | 1333  | 1967  | 2354  | 2624  | 2711  | 2553  |
| Hexa-<br>noic acid                  | 60 | 992  | 1039 | 5871  | 13686 | 87220 | 23750 | 24728 | 24085 |
| Hep-<br>tanoic<br>acid              | 60 | 1082 | -    | 1968  | 2798  | 3261  | 3464  | 2939  | 2845  |
| <b>Furans<br/>deriva-<br/>tives</b> |    |      |      |       |       |       |       |       |       |
| 2-pentyl-<br>furan                  | 81 | 991  | 1777 | 7193  | 13858 | 20997 | 19745 | 25239 | 38068 |
| <b>Ter-<br/>penes</b>               |    |      |      |       |       |       |       |       |       |
| $\alpha$ -pinene                    |    | 929  | 675  | -     | -     | -     | -     | -     | -     |
| $\beta$ -pinene                     |    | 971  | -    | -     | -     | -     | -     | -     | -     |

|                      |    |      |   |   |   |   |   |   |   |
|----------------------|----|------|---|---|---|---|---|---|---|
| δ-3-carene           | 93 | 1006 | - | - | - | - | - | - | - |
| <i>para</i> -cymene  | 93 | 1021 | - | - | - | - | - | - | - |
| Limonene             |    | 1025 | - | - | - | - | - | - | - |
| (E)-β-ocimene        |    | 1047 | - | - | - | - | - | - | - |
| Terpinolene          |    | 1085 | - | - | - | - | - | - | - |
| (E)-caryophyllene    |    | 1420 | - | - | - | - | - | - | - |
| Bergamotene (isomer) |    | 1439 | - | - | - | - | - | - | - |

11

**Table S3.** Results of the PVs, TBARs, Total Phenolic content, classes of volatiles, tocopherols and CBDA/CBD ratio before submitting samples to the accelerated test. Different letter in columns indicates statistically significant differences among samples (one-way ANOVA,  $p < 0.05$ , Tukey HSD).

12

13

| Sample | PVs<br>(mEqO <sub>2</sub> /kg of oil) | TBARs<br>(mg MDA/kg of oil) | Aldheydes<br>(area counts ×10 <sup>3</sup> ) | Ketones<br>(area counts ×10 <sup>3</sup> ) | Acids<br>(area counts ×10 <sup>3</sup> ) | Furans<br>(area counts ×10 <sup>3</sup> ) | Terpenes<br>(area counts ×10 <sup>3</sup> ) | Total phenols<br>(mg gallic acid/kg of oil) |
|--------|---------------------------------------|-----------------------------|----------------------------------------------|--------------------------------------------|------------------------------------------|-------------------------------------------|---------------------------------------------|---------------------------------------------|
| 1      | 12.62±1.07 <sup>a</sup>               | 11.28±0.69 <sup>a</sup>     | 79310 <sup>b</sup>                           | 18728 <sup>a</sup>                         | 53014 <sup>a</sup>                       | 21427 <sup>a</sup>                        | 27076 <sup>g</sup>                          | 50.37±2.03 <sup>c</sup>                     |
| 2      | 11.78±0.60 <sup>a,b</sup>             | 11.04±1.58 <sup>a</sup>     | 54553 <sup>c</sup>                           | 4161 <sup>d</sup>                          | 19997 <sup>b</sup>                       | -                                         | 85764 <sup>e</sup>                          | 106.50±8.8 <sup>b</sup>                     |
| 3      | 9.43±0.25 <sup>c</sup>                | 13.27±1.78 <sup>a</sup>     | 22471 <sup>f</sup>                           | 2786 <sup>e,f</sup>                        | 10665 <sup>c,d</sup>                     | -                                         | 99763 <sup>d</sup>                          | 45.58±2.71 <sup>c</sup>                     |
| 4      | 11.41±0.66 <sup>a,b</sup>             | 11.56±1.70 <sup>a</sup>     | 44554 <sup>d</sup>                           | 3931 <sup>d,e</sup>                        | 8506 <sup>d,e</sup>                      | -                                         | 241727 <sup>b</sup>                         | 15.39±0.79 <sup>e</sup>                     |
| 5      | 10.42±0.54 <sup>b,c</sup>             | 11.54±0.28 <sup>a</sup>     | 38251 <sup>d,e</sup>                         | 14477 <sup>b</sup>                         | 9810 <sup>d</sup>                        | -                                         | 270385 <sup>a</sup>                         | 16.75±0.41 <sup>e</sup>                     |
| 6      | 11.93±0.88 <sup>a,b</sup>             | 11.37±1.57 <sup>a</sup>     | 81114 <sup>b</sup>                           | 8363 <sup>c</sup>                          | 14170 <sup>c</sup>                       | 8111 <sup>b</sup>                         | 77792 <sup>e</sup>                          | 30.76±6.60 <sup>d</sup>                     |
| 7      | 10.87±0.41 <sup>a,b,c</sup>           | 12.25±1.15 <sup>a</sup>     | 30949 <sup>e,f</sup>                         | 1757 <sup>f</sup>                          | 7336 <sup>d,e</sup>                      | -                                         | 48310 <sup>f</sup>                          | 25.70±1.07 <sup>d</sup>                     |
| 8      | 11.95±0.81 <sup>a,b</sup>             | 12.01±0.97 <sup>a</sup>     | 73734 <sup>b</sup>                           | 8189 <sup>c</sup>                          | 11426 <sup>c,d</sup>                     | -                                         | 116165 <sup>c</sup>                         | 12.08±1.96 <sup>e</sup>                     |

| 9      | 1.83±0.06 <sup>d</sup>    | 17.15±0.83 <sup>a</sup>       | 141284 <sup>a</sup>           | 2156 <sup>f</sup>             | 4944 <sup>e</sup>         | 1777 <sup>c</sup>          | 675 <sup>h</sup>    | 186.78±4.5 <sup>a</sup> |
|--------|---------------------------|-------------------------------|-------------------------------|-------------------------------|---------------------------|----------------------------|---------------------|-------------------------|
| Sample | C18:1<br>(g/100 g of oil) | C18:2 n-6<br>(g/100 g of oil) | C18:3 n-3<br>(g/100 g of oil) | C18:3 n-6<br>(g/100 g of oil) | γ-tocopherol<br>(μg/g)    | α-tocopherol<br>(μg/g)     | CBDA/CBD            |                         |
| 1      | 11.50 <sup>b</sup>        | 48.62 <sup>a,b,c</sup>        | 11.40 <sup>c</sup>            | 2.43 <sup>b</sup>             | 641.91±29.25 <sup>b</sup> | 32.09±0.78 <sup>b,c</sup>  | 1.10 <sup>d</sup>   |                         |
| 2      | 10.90 <sup>c</sup>        | 50.37 <sup>a,b</sup>          | 14.89 <sup>b</sup>            | 0.39 <sup>d</sup>             | 568.68±39.34 <sup>b</sup> | 28.28±0.85 <sup>b,c</sup>  | -                   |                         |
| 3      | 10.80 <sup>c</sup>        | 50.58 <sup>a,b</sup>          | 15.31 <sup>b</sup>            | 0.37 <sup>d</sup>             | 569.99±16.46 <sup>b</sup> | 45.98±4.15 <sup>b,c</sup>  | 6.58 <sup>a</sup>   |                         |
| 4      | 13.08 <sup>a</sup>        | 48.20 <sup>a,b,c</sup>        | 10.99 <sup>c</sup>            | 1.61 <sup>c</sup>             | 376.28±10.72 <sup>c</sup> | 21.02±0.28 <sup>c</sup>    | 2.27 <sup>b,c</sup> |                         |
| 5      | 12.92 <sup>a</sup>        | 50.04 <sup>a,b</sup>          | 11.98 <sup>c</sup>            | 1.58 <sup>c</sup>             | 650.52±14.68 <sup>b</sup> | 41.53±3.09 <sup>b,c</sup>  | 2.62 <sup>b,c</sup> |                         |
| 6      | 7.12 <sup>f</sup>         | 47.63 <sup>b,c</sup>          | 15.53 <sup>b</sup>            | 3.51 <sup>a</sup>             | 906.63±65.75 <sup>a</sup> | 65.92±4.86 <sup>b</sup>    | -                   |                         |
| 7      | 11.05 <sup>b</sup>        | 50.96 <sup>a</sup>            | 14.96 <sup>b</sup>            | 0.37 <sup>d</sup>             | 622.24±12.12 <sup>b</sup> | 59.30±1.46 <sup>b,c</sup>  | 1.72 <sup>c,d</sup> |                         |
| 8      | 7.72 <sup>e</sup>         | 49.76 <sup>a,b</sup>          | 17.17 <sup>a</sup>            | 3.71 <sup>a</sup>             | 893.81±7.78 <sup>a</sup>  | 49.81±0.63 <sup>b,c</sup>  | 2.17 <sup>b,c</sup> |                         |
| 9      | 8.45 <sup>d</sup>         | 46.35 <sup>c</sup>            | 15.27 <sup>b</sup>            | 3.59 <sup>a</sup>             | 816.31±53.49 <sup>a</sup> | 1095.62±45.21 <sup>a</sup> | 1.44 <sup>d</sup>   |                         |

14  
15  
16

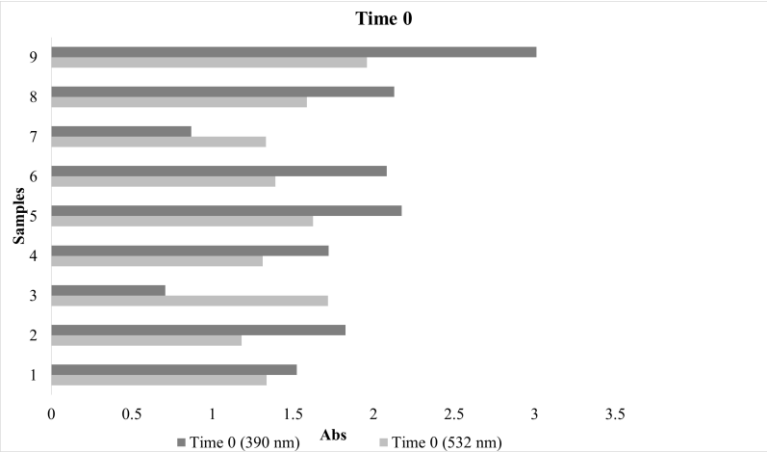

(a)

17  
18

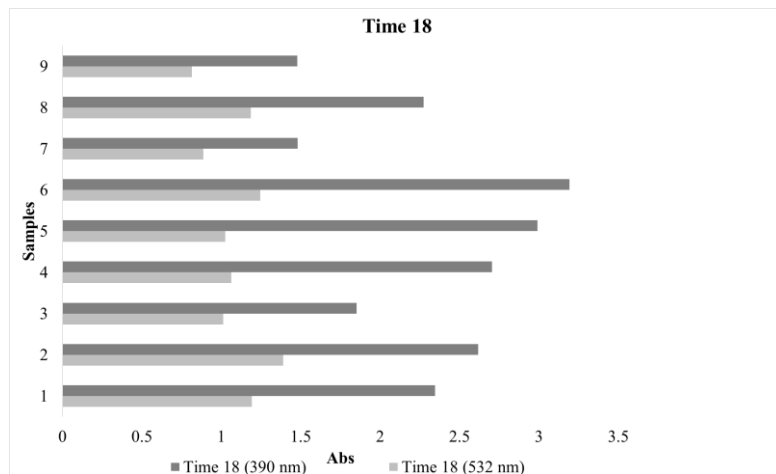

(b)

**Figure S1.** Absorbance measured at 390 and 532 nm for samples at time 0 (a) and at time 18 (b).

19

20

21
